# Supplementary material for: An AIE-based bioprobe for differentiating the early and late stages of apoptosis mediated by H2O2
Source: Royal Society of Chemistry journal article supplement (doi:10.1039/c6tb01734g), 2016-01-01
Supplement: c6tb01734g1.pdf [file c6tb01734g1.pdf]

*Supporting Information*

**AIE-based bioprobe for differentiating early  
and late stages of apoptosis mediated by H<sub>2</sub>O<sub>2</sub>**

Anakin, C. S. Leung,<sup>†a,b</sup> Engui Zhao,<sup>†a,b</sup> Ryan T. K. Kwok,<sup>a,b</sup> Jacky W. Y. Lam,<sup>a,b</sup>

Chris W. T. Leung,<sup>a,b</sup> Haiqin Deng,<sup>a,b</sup> and Ben Zhong Tang<sup>a,b,c</sup>

<sup>a</sup> Department of Chemistry, Hong Kong Branch of Chinese National Engineering Research Center for Tissue Restoration and Reconstruction, Institute for Advanced Study, Institute of Molecular Functional Materials, Division of Biomedical Engineering, Division of Life Science and State Key Laboratory of Molecular Neuroscience, The Hong Kong University of Science & Technology (HKUST), Clear Water Bay, Kowloon, Hong Kong, China

<sup>b</sup> HKUST-Shenzhen Research Institute, No. 9 Yuexing first RD, South Area, Hi-tech Park, Nanshan, Shenzhen 518057, China

<sup>c</sup> Guangdong Innovative Research Team, SCUT-HKUST Joint Research Laboratory, State Key Laboratory of Luminescent Materials and Devices, South China University of Technology (SCUT), Guangzhou 510640, China

## Table of Contents

**Scheme S1.** Synthetic route to TPE-Zn<sub>2</sub>BDPA.

**Fig. S1.** <sup>1</sup>H NMR spectrum of TPE-BDPA in DMSO-*d*<sub>6</sub>.

**Fig. S2.** <sup>13</sup>C NMR spectrum of TPE-BDPA in DMSO-*d*<sub>6</sub>.

**Fig. S3.** High-Resolution Mass spectrum (HRMS) of TPE-BDPA.

**Fig. S4.** <sup>1</sup>H NMR spectrum of TPE- Zn<sub>2</sub>BDPA in DMSO-*d*<sub>6</sub>.

**Fig. S5.** <sup>13</sup>C NMR spectrum of TPE- Zn<sub>2</sub>BDPA in DMSO-*d*<sub>6</sub>.

**Fig. S6.** HRMS of TPE- Zn<sub>2</sub>BDPA.

**Fig. S7.** (A) Emission spectra of TPE-Zn<sub>2</sub>BDPA in DMSO/water mixtures with different water fractions. (B) Plot of relative PL intensity ( $I/I_0$ ) at 478 nm versus the composition of the DMSO/water mixtures of TPE-Zn<sub>2</sub>BDPA.

**Fig. S8.** Cytotoxicity of TPE-Zn<sub>2</sub>BDPA evaluated by MTT assay.

**Fig. S9.** Confocal images of early apoptotic HeLa cells and late apoptotic HeLa cells induced by H<sub>2</sub>O<sub>2</sub> followed by co-staining with Annexin V-FITC and PI.

**Fig. S10.** Confocal images of untreated and H<sub>2</sub>O<sub>2</sub>-treated HeLa cells and HepG2 cells stained with TPE-Zn<sub>2</sub>BDPA.

**Fig. S11.** Confocal images of HepG2 cells pretreated with H<sub>2</sub>O<sub>2</sub> co-stained with PI and TPE-Zn<sub>2</sub>BDPA and co-stained with PI and Annexin V-FITC.

**Fig. S12.** Confocal images of HepG2 cells pretreated with H<sub>2</sub>O<sub>2</sub> and co-stained with TPE-Zn<sub>2</sub>BDPA, PI and Annexin V-FITC.

**Fig. S13.** Flow cytometry analysis of apoptotic HeLa cells induced by H<sub>2</sub>O<sub>2</sub> at different concentration for 9 h, stained with TPE-Zn<sub>2</sub>BDPA and Annexin V-FITC.

**Fig. S14.** Photostability of apoptotic HeLa cells stained with TPE-Zn<sub>2</sub>BDPA and Annexin V-FITC with increasing scanning time.

**Fig. S15** (A–D) Bright-field and (E–H) fluorescent images of HeLa cells treated with H<sub>2</sub>O<sub>2</sub> for 9 h and followed by staining of TPE-Zn<sub>2</sub>BDPA for 15 min (A and E), treated with CDDP for 6 h and followed by staining with TPE-Zn<sub>2</sub>BDPA for 30 mins (B and F), incubated in BSO for 24 h and reacted with CDDP for 6 h and followed by staining with TPE-Zn<sub>2</sub>BDPA for 30 mins (C and G), treated with STS for 2 h before staining with TPE-Zn<sub>2</sub>BDPA for 30 min (D and H). Concentration: TPE-Zn<sub>2</sub>BDPA = 5 μM, H<sub>2</sub>O<sub>2</sub> = 2 mM, BSO = 1 mM, CDDP = 0.5 mM; λ<sub>ex</sub>: 330–385 nm; scale bar: 30 μm.

## Experimental Section

### Materials and Method

THF (Labscan) was purified by simple distillation from sodium benzophenone ketyl under nitrogen immediately before use. 1-Bromo-3,5-dimethylbenzene, *N*-bromosuccinimide (NBS), benzoyl peroxide (BPO), *N,N*-Diisopropylethylamine (DIPEA), potassium carbonate, tetrakis (triphenylphosphine) palladium [Pd(PPh<sub>3</sub>)<sub>4</sub>], Zinc Nitrate, methanol, hydrogen peroxide solution, propidium iodide (PI) and other reagents were all purchased from Aldrich and used as received. Di-(2-picoyl) amine (DPA) was purchased from J&K and used as received. Carbon tetrachloride was purchased from Nacalai Tesque and used as received. Chloroform and dichloromethane (DCM) were purchased from Scharlau and used as received. The compounds **2**, **3** and **4** were prepared following the reported procedures<sup>1</sup>.

<sup>1</sup>H and <sup>13</sup>C NMR spectra were measured on a Bruker AV 400 spectrometer in DMSO-*d*<sub>6</sub>. High-resolution mass spectra (HRMS) were recorded on a GCT premier CAB048 mass spectrometer operating in MALDI-TOF mode. The PL spectra were recorded on a PerkinElmer LS 55 spectrophotometer. UV spectra were measured on a Milton Ray Spectronic 3000 Array spectrophotometer

Minimum essential medium (MEM), Dulbecco's Modified Eagle Medium (DMEM), fetal bovine serum (FBS), penicillin and streptomycin were purchased from Life Technologies. Annexin V-FITC and its 5X binding solution were purchased from Promokine.

### Synthesis

**Preparation of TPE-BDPA (5).** A suspension of TPE-B(OH)<sub>2</sub> (**4**, 0.188 g, 0.5 mmol), bromo-BDPA (**3**, 0.17 g, 0.3 mmol), Pd(PPh<sub>3</sub>)<sub>4</sub> (0.015 g, 0.025 mmol), K<sub>2</sub>CO<sub>3</sub> (0.15 g, 2.08 mmol) in dry THF (25 mL) and distilled water (6 mL) were refluxed for 24 h. Afterward, the reaction mixture was cooled to room temperature and filtered. The filtrate was extracted with DCM and washed with brine for 3 times and the crude product was purified on an alumina column using DCM as eluent. Compound **4** was isolated as yellow solid in 80% yield. δ<sub>H</sub> (400 MHz, DMSO-*d*<sub>6</sub>): δ (TMS, ppm) 3.73 (s, 4H), 3.84 (s, 8H), 7.04-7.15 (m, 20H), 7.27 (s, 1H), 7.33-7.35 (d, 2H), 7.46 (s, 3H), 7.59-7.61 (m, 8H), 8.51-8.52 (dd, 4H). δ<sub>C</sub> (400 MHz, CDCl<sub>3</sub>): δ (TMS, ppm) 149.00, 143.79, 143.76, 141.14, 140.53, 139.53, 138.73, 136.44, 131.79, 131.46, 131.37, 128.07, 127.80, 127.72, 127.67, 126.51, 126.45, 126.24, 126.21, 122.78, 121.98, 60.14, 58.68. HRMS (MALDI-TOF): *m/z* 830.4097 [M<sup>+</sup>, calcd: 830.4051].

**Preparation of TPE-Zn<sub>2</sub>BDPA (6).** A methanolic solution of compound **5** (0.207 g, 0.25 mmol) and an aqueous solution of zinc nitrate (0.1521 g, 0.512 mmol) were mixed and stirred for 0.5 h. The solvent was removed and the residue lyophilized to

afford the complex **6** in quantitative yield.  $\delta_{\text{H}}$  (400 MHz, DMSO- $d_6$ ) :  $\delta$  (TMS, ppm) 3.75-3.79 (d, 4H), 3.96 (s, 4H), 4.38-4.42 (d, 4H), 6.99-7.22 (m, 17H), 7.32 (s, 1H), 7.55-7.68 (m, 12H), 8.06-8.10 (t, 4H), 8.65-8.66 (d, 4H).  $\delta_{\text{C}}$  (400 MHz, DMSO- $d_6$ ) :  $\delta$  (TMS, ppm) 149.27, 143.67, 143.58, 142.75, 141.23, 140.57, 139.81, 136.96, 131.90, 131.77, 131.21, 131.12, 129.28, 129.16, 128.38, 128.33, 128.26, 127.07, 126.35, 126.02, 122.86, 122.61, 59.70, 57.91. HRMS (MALDI-TOF):  $m/z$  1144.2347 [M-NO<sub>3</sub><sup>+</sup>, calcd: 1144.2327]

### **Cell Culture and Imaging**

**Cell Culture** HeLa cells and HepG2 cells were cultured in the MEM or DMEM containing 10% FBS and antibiotics (100 units/mL penicillin and 100  $\mu\text{g/mL}$  streptomycin) in a 5% CO<sub>2</sub> humidity incubator at 37°C respectively.

**Cell Imaging** HeLa cells were grown overnight on a 35 mm petri dish with a cover slip. The cells were stained with 5  $\mu\text{M}$  of TPE-Zn<sub>2</sub>BDPA for 15 min (by adding 1  $\mu\text{L}$  of a 10 mM stock solution of TPE-Zn<sub>2</sub>BDPA in DMSO to 2 mL culture medium) or 0.5  $\mu\text{M}$  of PI for 30 min (by adding 0.5  $\mu\text{L}$  of a 1 mM stock solution of PI in H<sub>2</sub>O to 2 mL culture medium) or Annexin V- FITC solution for 15 mins (by adding 2  $\mu\text{L}$  of Annexin V – FITC to 100  $\mu\text{L}$  of 1X binding buffer). The cells were imaged under an FL microscope (BX41 Microscope) using different combination of excitation and emission filters for each dye: for TPE-Zn<sub>2</sub>BDPA, excitation filter = 330–385 nm, dichroic mirror = 400 nm, and emission filter = 420 nm long pass. The cells were also imaged under confocal microscope (Zeiss Laser Scanning Confocal Microscope; LSM7 DUO) and different sets of filters. TPE-Zn<sub>2</sub>BDPA was excited at 405 nm (100 % laser power) and the fluorescence was collected at 415–490 nm while Annexin V- FITC and PI used FITC and Texas Red filter respectively.

For photo-stability test, the cells were imaged by confocal microscope (Zeiss Laser Scanning Confocal Microscope; LSM7 DUO). TPE-Zn<sub>2</sub>BDPA was excited at 405 nm (100 % laser power) and the fluorescence was collected at 415–490 nm. Annexin V using FITC filter was excited at 470 nm (100 % laser power) and fluorescence was collected at 500–550 nm.

**Cell Viability Evaluated by MTT Assay.** Viability of the cells was assayed using cell proliferation Kit I with the absorbance of 595 nm being detected using a Perkin-Elmer Victor plate reader. Five thousand cells were seeded per well in a 96-well plate. After overnight culture, various concentrations of TPE-Zn<sub>2</sub>BDPA were added into the 96-well plate. After 24 h treatment, 10  $\mu\text{L}$  of 3-(4,5-dimethyl-2-thiazolyl)-2,5-diphenyltetrazolium bromide (MTT) solution (5 mg/mL in phosphate buffer solution) was added into the each well. After 4 h incubation at 37 °C, 100  $\mu\text{L}$  of solubilization solution containing 10%

SDS and 0.01 M HCl was added to dissolve the purple crystals. After 4 h incubation, the optical density readings at 595 nm were taken using a plate reader. Each of the experiments was performed at least 3 times.

**Flow Cytometric Assay** HeLa cells were cultured in a 60 mm petri dish. After overnight culture, HeLa cells were treated with 300  $\mu$ M or 2000  $\mu$ M H<sub>2</sub>O<sub>2</sub> for 9h in the incubator. The treated cells were trypsinised and collected by centrifugation. The supernatant was removed and the cells were then stained with 5  $\mu$ M of TPE-Zn<sub>2</sub>BDPA for 15 min, 0.5  $\mu$ M of PI for 30 min or 2  $\mu$ L Annexin V-FITC solution for 15 mins. The staining solution was then removed. The cells were washed three times with PBS. The cells were re-suspended with PBS (pH 7.4). The fluorescence signals of the red, blue and green emission were collected in a flow cytometry (Becton Dickinson FACS Aria IIIu). Signals were collected from blue channel ( $\lambda_{\text{ex}}$ : 375 nm,  $\lambda_{\text{em}}$ : 450 $\pm$ 20 nm), FITC green channel ( $\lambda_{\text{ex}}$ : 488 nm,  $\lambda_{\text{em}}$ : 530  $\pm$ 15 nm) and PI red channel ( $\lambda_{\text{ex}}$ : 561 nm,  $\lambda_{\text{em}}$ : 610  $\pm$  10 nm).

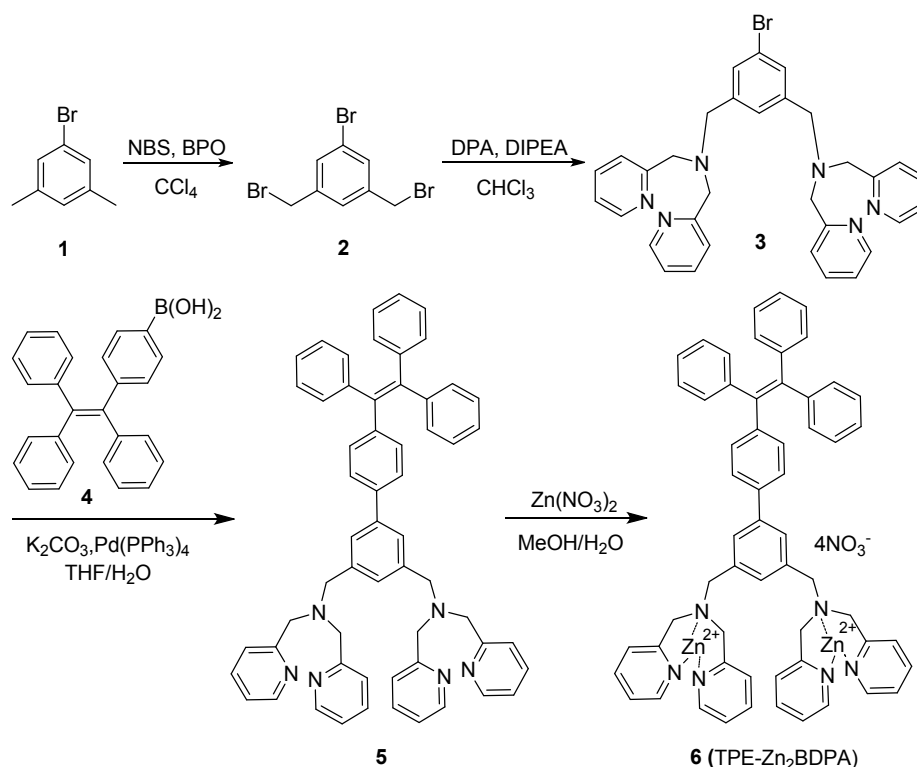

**Scheme S1.** Synthetic route to TPE-Zn<sub>2</sub>BDPA.

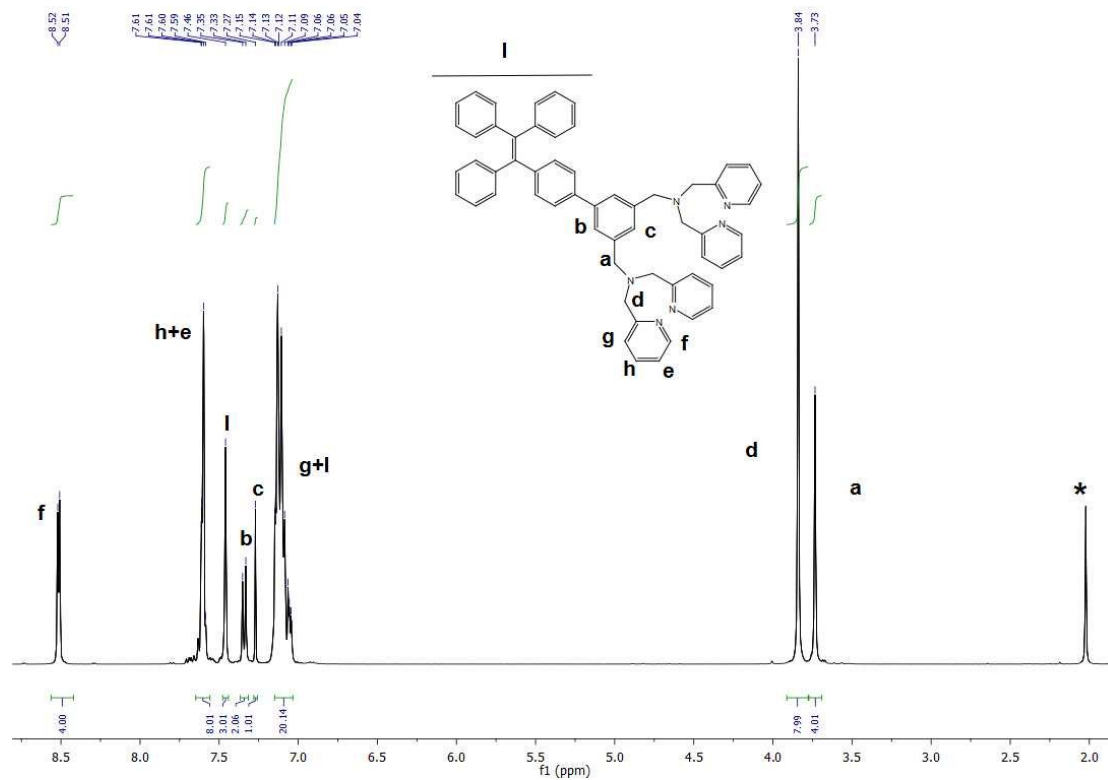

**Fig. S1** <sup>1</sup>H NMR spectrum of **5** in DMSO-*d*<sub>6</sub>.

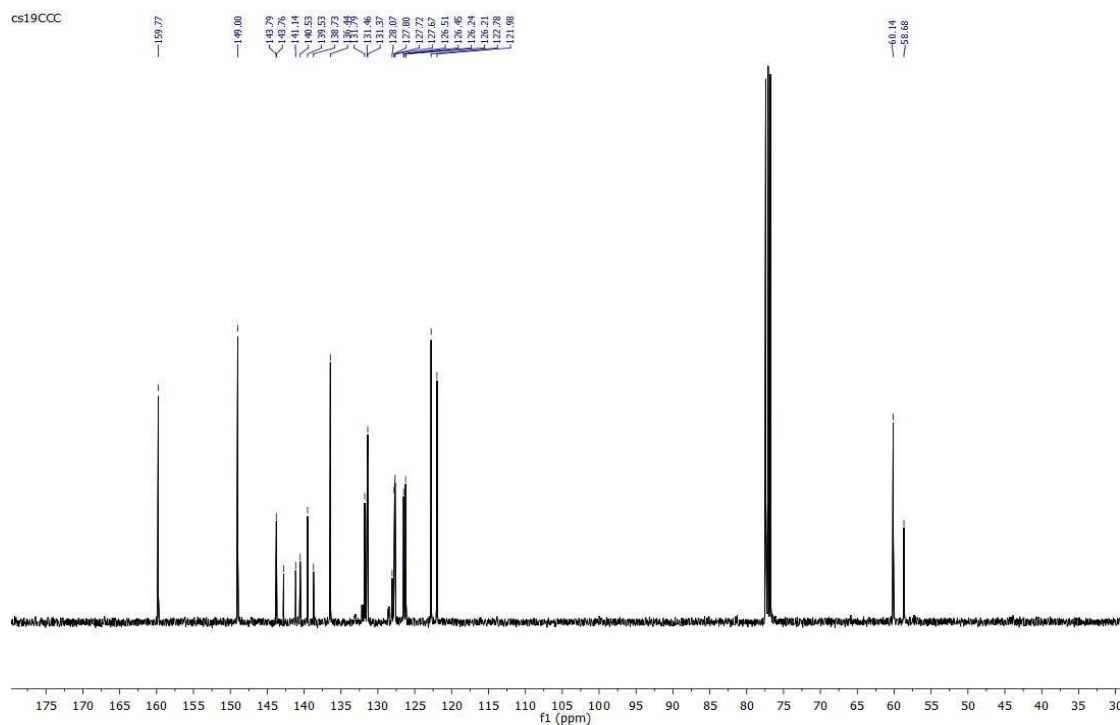

**Fig. S2** <sup>13</sup>C NMR spectrum of **5** in DMSO-*d*<sub>6</sub>.

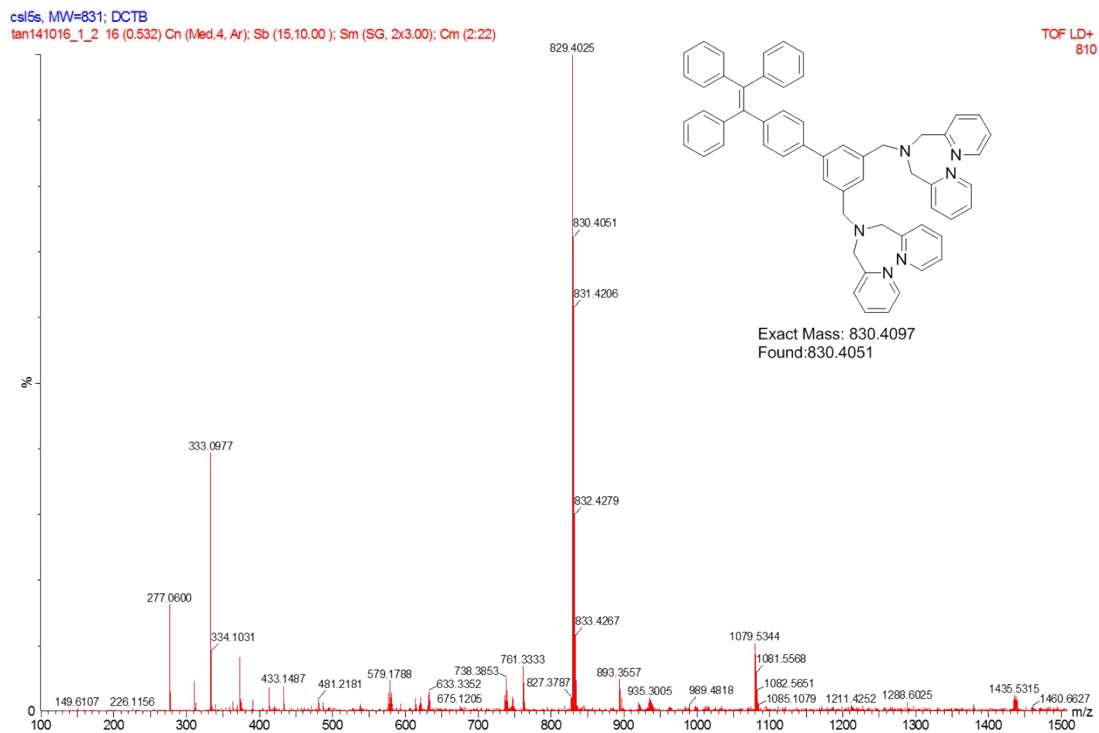

**Fig. S3** High resolution mass spectrum of **5**.

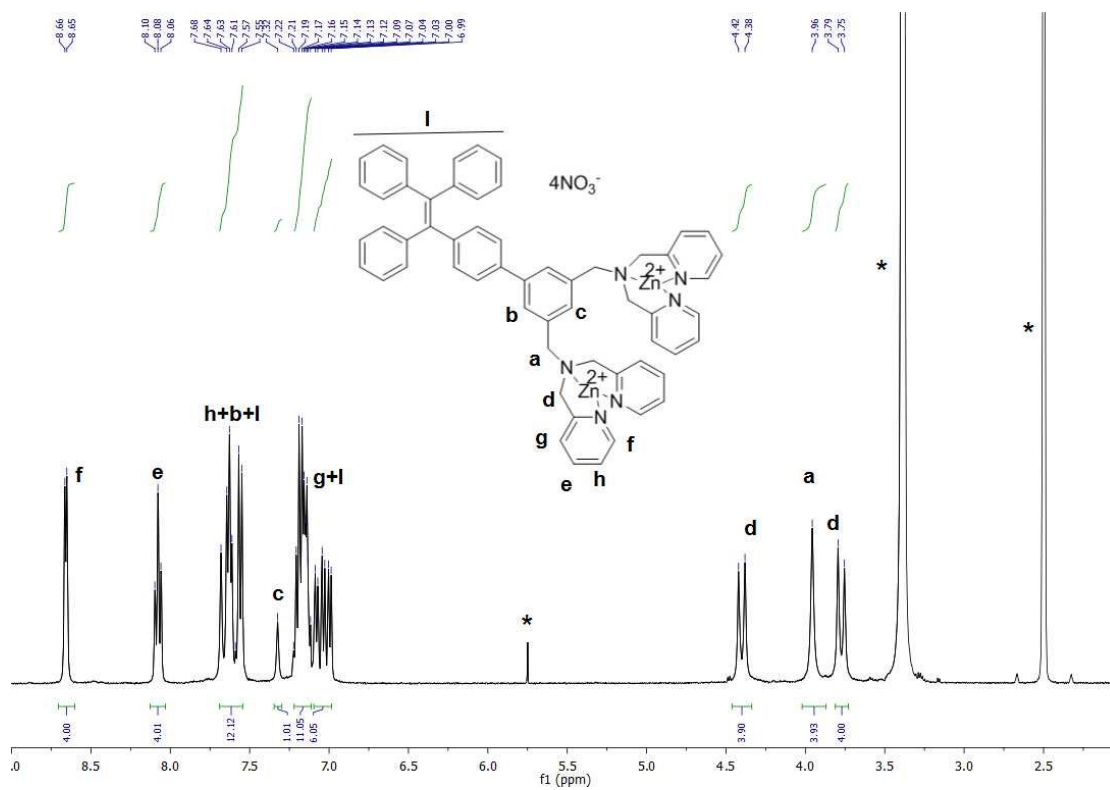

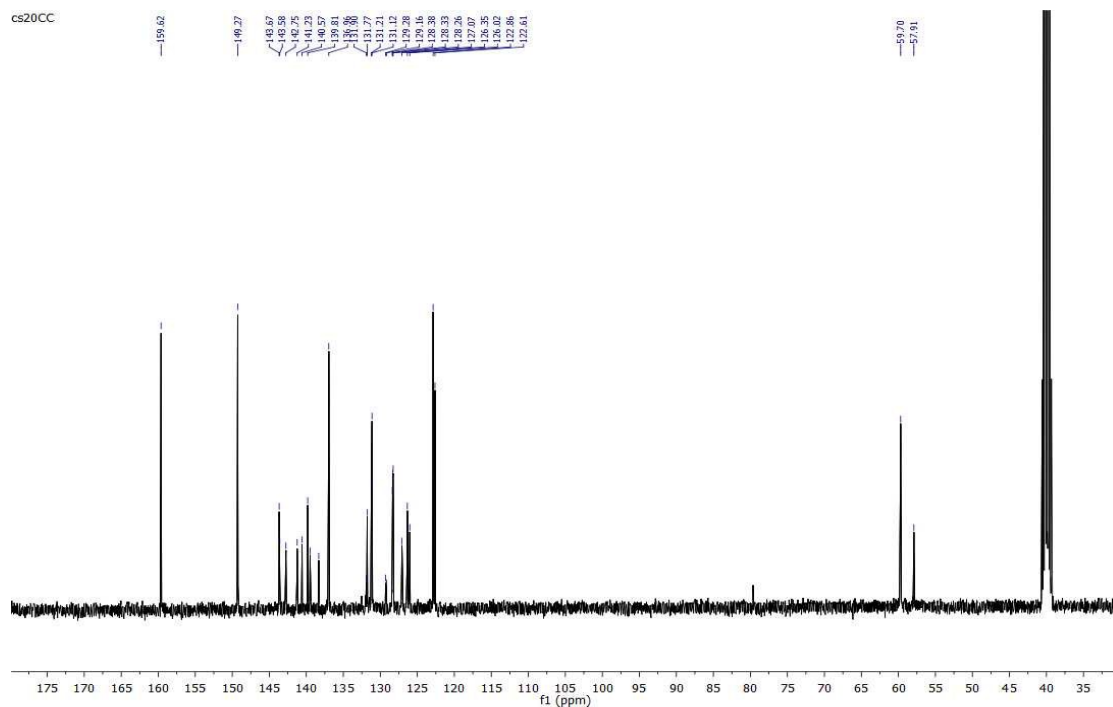

Fig. S5  $^{13}\text{C}$  NMR spectrum of TPE- $\text{Zn}_2\text{BDPA}$  in  $\text{DMSO-}d_6$ .

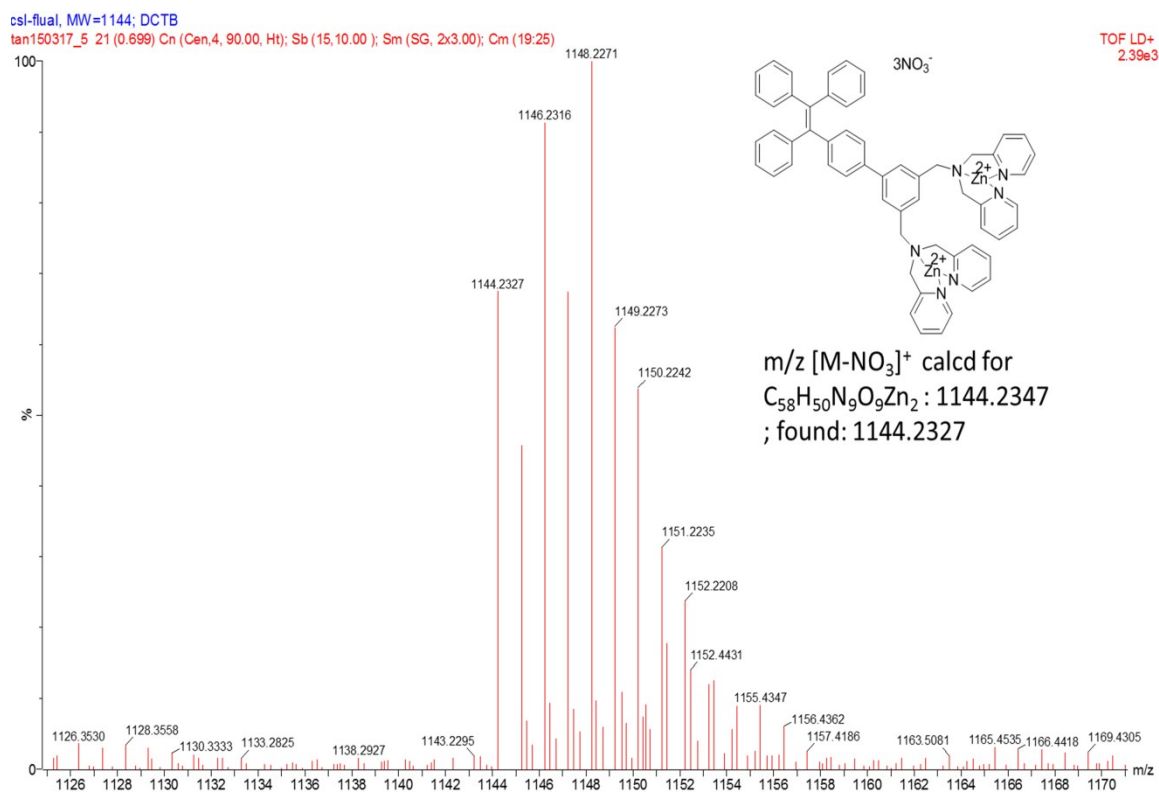

Fig. S6 HRMS of TPE- $\text{Zn}_2\text{BDPA}$ .



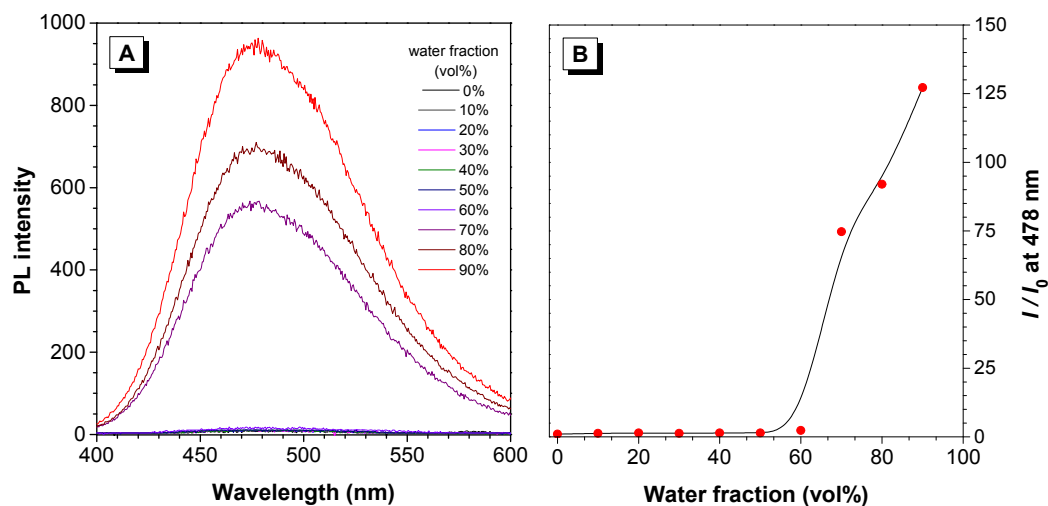

**Fig. S7.** (A) Emission spectra of TPE-Zn<sub>2</sub>BDPA in DMSO/water mixtures with different water fractions. (B) Plot of relative PL intensity ( $I/I_0$ ) at 478 nm versus the composition of the DMSO/water mixtures of TPE-Zn<sub>2</sub>BDPA, where  $I_0$  is the PL intensity of TPE-Zn<sub>2</sub>BDPA in pure DMSO. Concentration: 10  $\mu$ M;  $\lambda_{ex}$ : 325 nm.

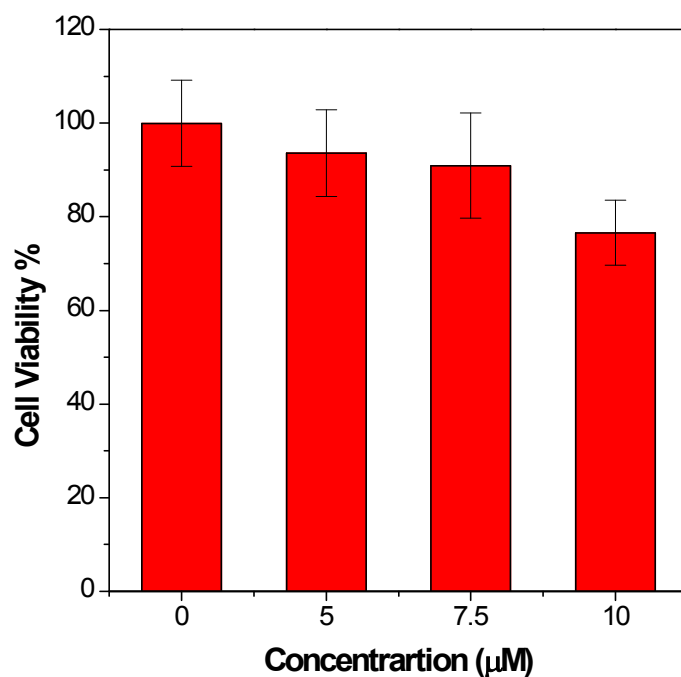

**Fig. S8** Cytotoxicity of TPE-Zn<sub>2</sub>BDPA evaluated by MTT assay

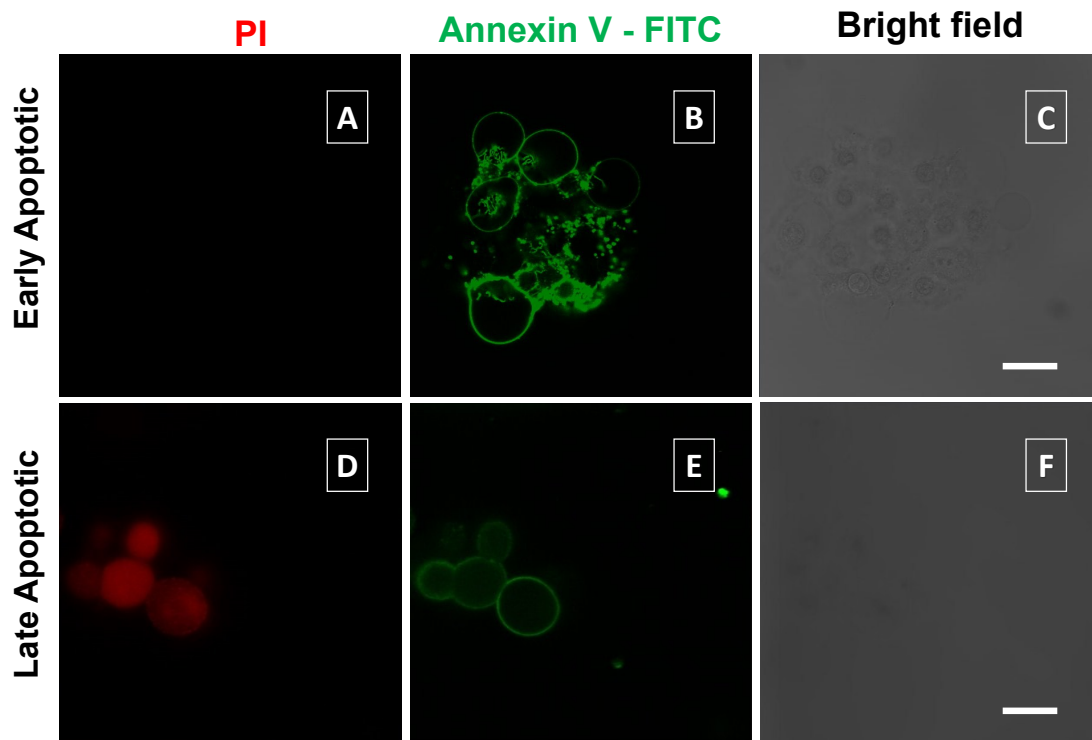

**Fig. S9** (A–B and D–E) CLSM and (C and F) bright-field images of early apoptotic HeLa cells (A–C) induced by H<sub>2</sub>O<sub>2</sub> (300 μM) and late apoptotic HeLa cells (D–F) induced by H<sub>2</sub>O<sub>2</sub> (2000 μM), followed by co-staining with Annexin V-FITC (B and E) and PI (A and D). Concentration: 0.5 μM (PI) and 2 μL (Annexin V-FITC); Texas Red filter:  $\lambda_{\text{ex}}$ : 572±12.5 nm; band pass filter: 598–660 nm (A and D), FITC filter:  $\lambda_{\text{ex}}$ : 470±20 nm; band pass filter: 500–550 nm (B and E); scale bar = 20 μm.

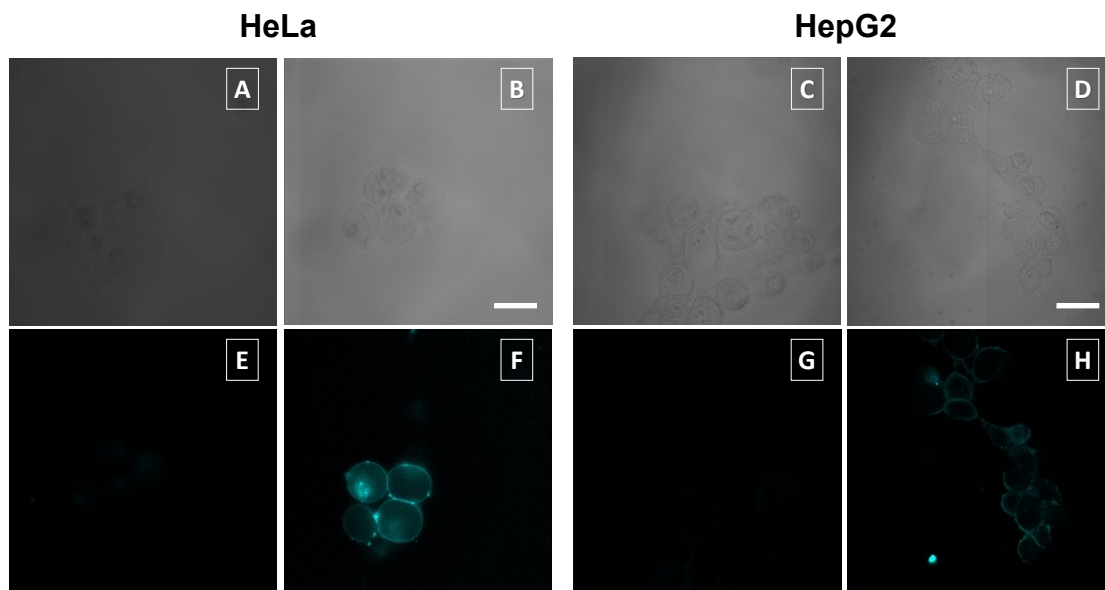

**Fig. S10** (A–D) Bright-field (E–F) and confocal images of untreated (A and E) and H<sub>2</sub>O<sub>2</sub>-treated HeLa cells (B and F), and untreated (C and G) and H<sub>2</sub>O<sub>2</sub>-treated HepG2 cells (D and H) stained with TPE-Zn<sub>2</sub>BDPA for 15 mins. Concentration: 5 μM (TPE-Zn<sub>2</sub>BDPA), 2000 μM (H<sub>2</sub>O<sub>2</sub>; HeLa) and 3000 μM (H<sub>2</sub>O<sub>2</sub>; HepG2);  $\lambda_{\text{ex}}$ : 330–385 nm; scale bar: 30 μm.

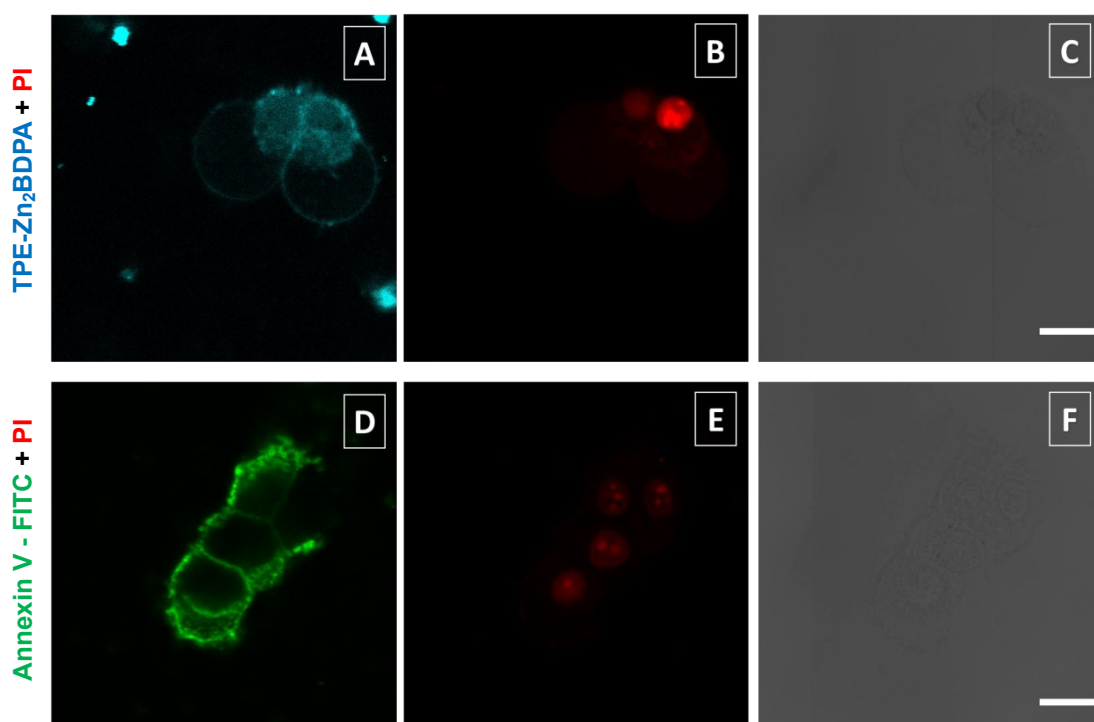

**Fig. S11** (A, B, D and E) Confocal and (C and F) bright-field images of HepG2 cells pretreated with  $\text{H}_2\text{O}_2$  (3000  $\mu\text{M}$ ) co-stained with PI and TPE- $\text{Zn}_2\text{BDPA}$  (A–C), and co-stained with PI and Annexin V-FITC (D–F). Concentration: 0.5  $\mu\text{M}$  (PI), 5  $\mu\text{M}$  (TPE- $\text{Zn}_2\text{BDPA}$ ) and 2  $\mu\text{L}$  (Annexin V-FITC);  $\lambda_{\text{ex}}$ : 405 nm; band pass filter: 415–490 nm (A), Texas Red filter:  $\lambda_{\text{ex}}$ : 572 $\pm$ 12.5 nm; band pass filter: 598–660nm (B and E), FITC filter:  $\lambda_{\text{ex}}$ : 470 $\pm$ 20 nm; band pass filter: 500–550 nm (D); scale bar = 20  $\mu\text{m}$ .

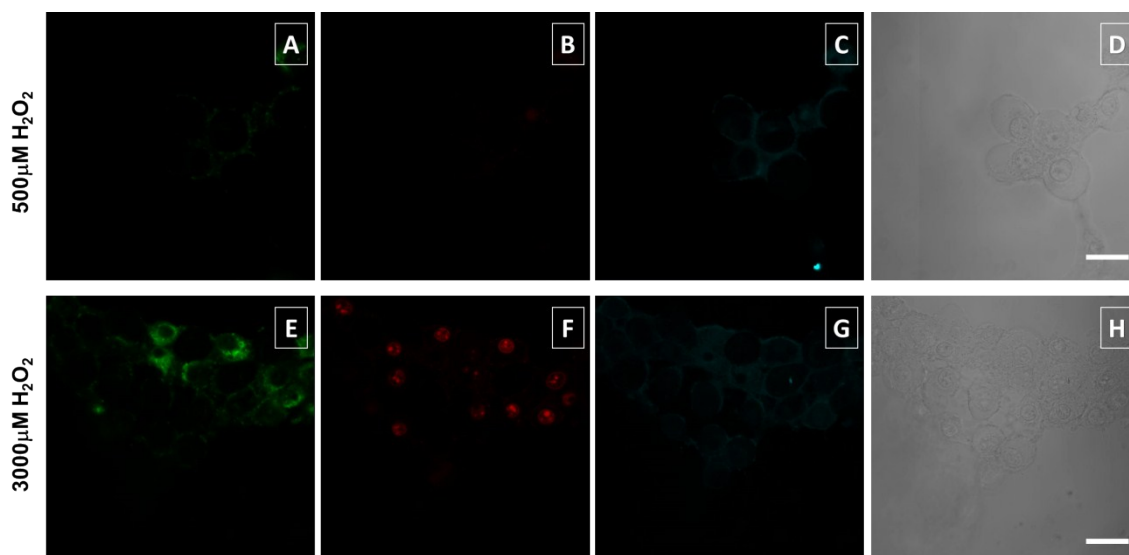

**Fig. S12** (A–C and E–G) Confocal and (D and H) bright field images of HepG2 cells pretreated with H<sub>2</sub>O<sub>2</sub> at concentration of 500 μM (A–D) and 3000 μM (E–H), and co-stained with TPE-Zn<sub>2</sub>BDPA, PI and Annexin V-FITC. Concentration: 5 μM (TPE-Zn<sub>2</sub>BDPA), 0.5 μM (PI) and 2 μL (Annexin V-FITC); λ<sub>ex</sub>: 405 nm; band pass filter: 415–490 nm (C and G), Texas Red filter: λ<sub>ex</sub>: 572±12.5 nm (B and F) ; FITC filter: λ<sub>ex</sub>: 470±20 nm; band pass filter: 500–550 nm (A and E); scale bar: 20 μm.

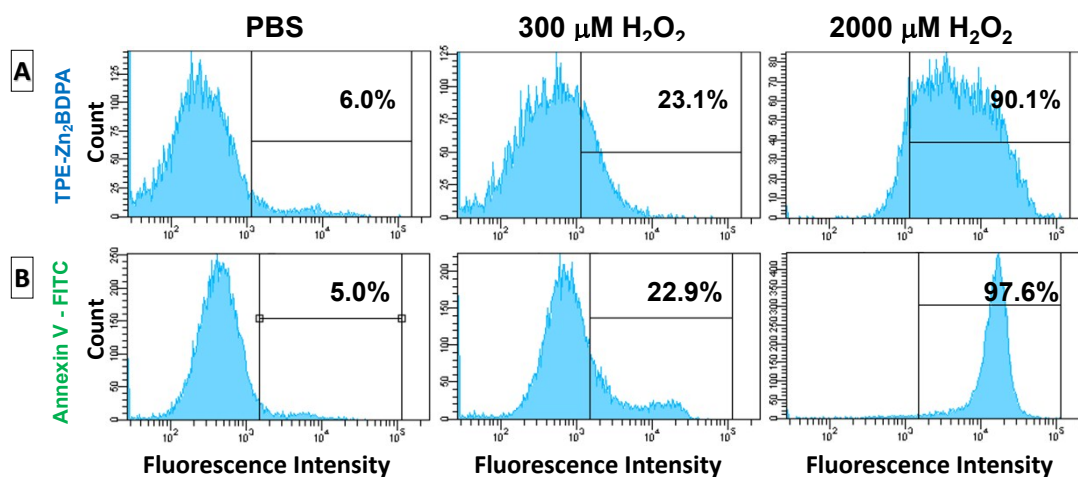

**Fig. S13** Flow cytometry analysis of apoptotic HeLa cells induced by H<sub>2</sub>O<sub>2</sub> at different concentrations for 9 h, stained with (A) TPE-Zn<sub>2</sub>BDPA and (B) Annexin V-FITC.

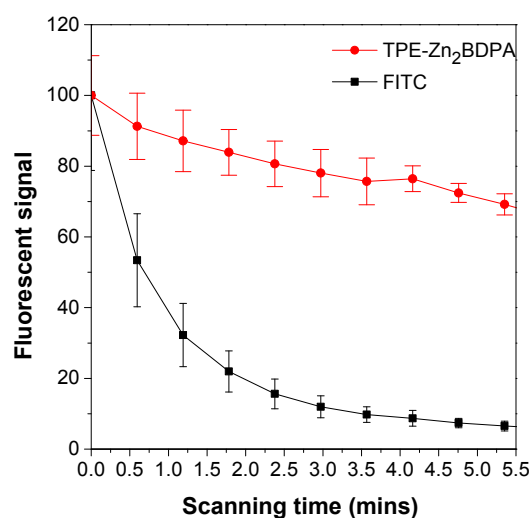

**Fig. S14** Photostability of HeLa cells pretreated with 2000  $\mu\text{M}$   $\text{H}_2\text{O}_2$  and stained with TPE-Zn<sub>2</sub>BDPA and Annexin V-FITC with increasing scanning time. Concentration: 5  $\mu\text{M}$  (TPE-Zn<sub>2</sub>BDPA) and 2  $\mu\text{L}$  (Annexin V-FITC);  $\lambda_{\text{ex}}$ : 405 nm; band pass filter 415–490 nm (TPE-Zn<sub>2</sub>BDPA) and FITC filter:  $\lambda_{\text{ex}}$ : 470 $\pm$ 20 nm; band pass filter: 500–550 nm (FITC).

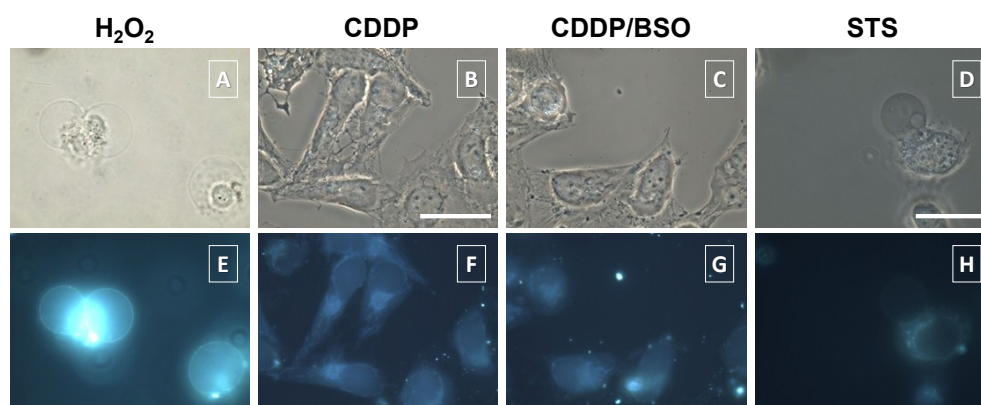

**Fig. S15** (A–D) Bright-field and (E–H) fluorescent images of HeLa cells treated with  $\text{H}_2\text{O}_2$  for 9 h and followed by staining of TPE-Zn<sub>2</sub>BDPA for 15 min (A and E), treated with CDDP for 6 h and followed by staining with TPE-Zn<sub>2</sub>BDPA for 30 mins (B and F), incubated in BSO for 24 h and reacted with CDDP for 6 h and followed by staining with TPE-Zn<sub>2</sub>BDPA for 30 mins (C and G), treated with STS for 2 h before staining with TPE-Zn<sub>2</sub>BDPA for 30 min (D and H). Concentration: TPE-Zn<sub>2</sub>BDPA = 5  $\mu\text{M}$ ,  $\text{H}_2\text{O}_2$  = 2 mM, BSO = 1 mM, CDDP = 0.5 mM;  $\lambda_{\text{ex}}$ : 330–385 nm; scale bar: 30  $\mu\text{m}$ .

## Reference

1. H. W. Rhee, H.Y. Choi, K. Han and J. I. Hong, *J. Am. Chem. Soc.*, 2007, **129**, 4524-4525.
